# Supplementary material for: Lithium salt–nonionic surfactant lyotropic liquid crystalline gel-electrolytes with redox couple for dye sensitized solar cells
Source: Royal Society of Chemistry journal article supplement (doi:10.1039/c6ra19979h), 2016-01-01
Supplement: c6ra19979h1.pdf [file c6ra19979h1.pdf]

# Lithium Salt-Nonionic Surfactant Lyotropic Liquid Crystalline Gel-Electrolytes with Redox Couple for Dye Sensitized Solar Cells

Ezgi Yılmaz,<sup>a</sup> Elif Berna Olutas,<sup>a,b</sup> Gözde Barım,<sup>a</sup> Jayasundera Bandara,<sup>c</sup> and Ömer Dag<sup>a\*</sup>

<sup>a</sup>Bilkent University, Department of Chemistry, 06800, Ankara, Turkey

<sup>b</sup>Abant İzzet Baysal University, Department of Chemistry, 14030, Bolu, Turkey

<sup>c</sup>National Institute of Fundamental Studies, Hantana Road, Kandy, CP20000, Sri Lanka.

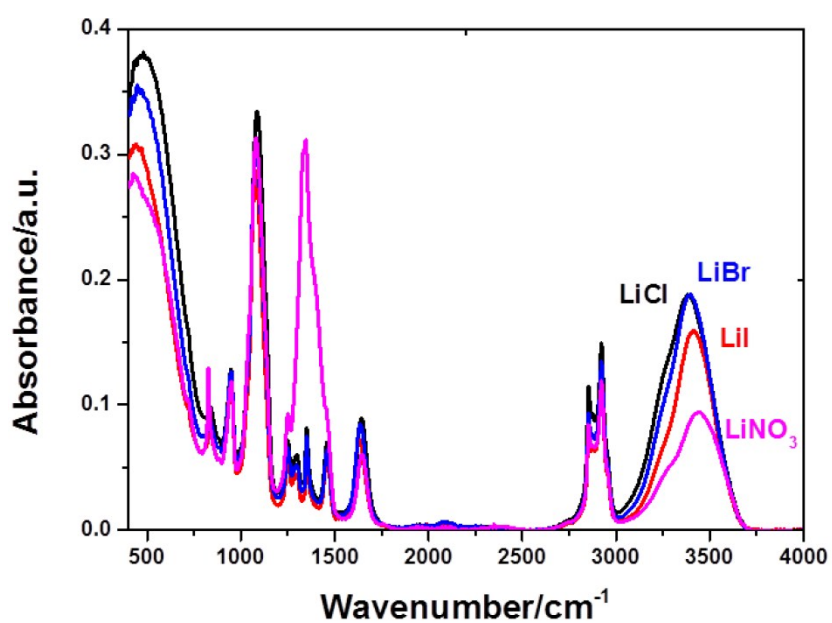

**Figure S1.** ATR-FTIR spectra of G2-LiX-3 (X is Cl<sup>-</sup>, Br<sup>-</sup>, I<sup>-</sup>, and NO<sub>3</sub><sup>-</sup>) upon aging for 2 days under ambient conditions.

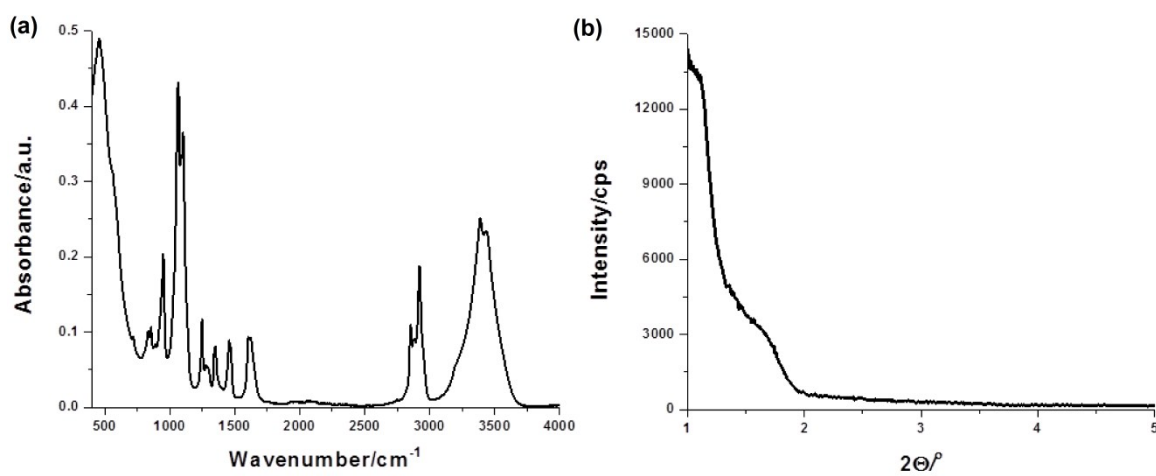

**Figure S2.** (a) ATR-FTIR (# is 4) spectrum and (b) PXRD pattern (# is 5) of G2-LiI-I<sub>2</sub>-# (with a LiI/I<sub>2</sub> mole ratio of 1)

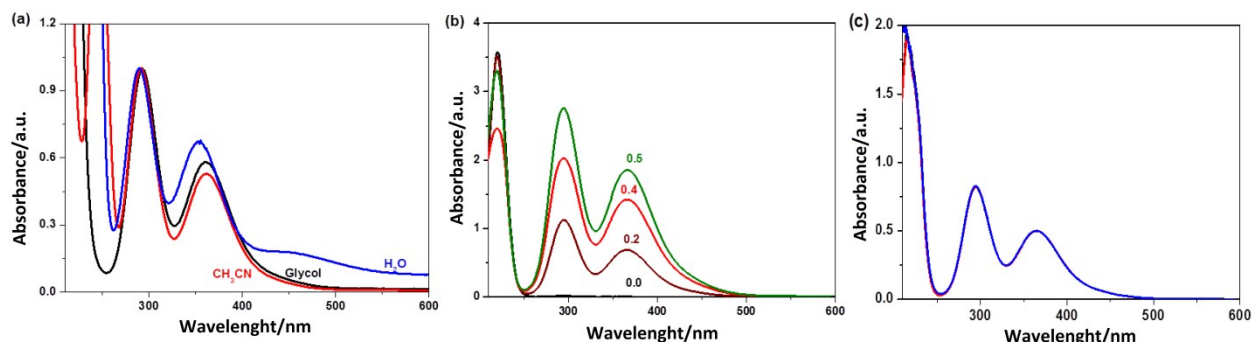

**Figure S3.** UV-Vis absorption spectra of  $\text{LiI/I}_2$  in various media, (a) as solution of glycol, acetonitrile, and water, (b) as  $\text{G2-LiI-I}_2$  with various  $\text{I}_2/\text{C}_{12}\text{E}_{10}$  mole ratios marked, and (c) as  $\text{G2-LiI-I}_2\text{-LiX}$  (X is  $\text{Cl}^-$ ,  $\text{Br}^-$ , and  $\text{NO}_3^-$ , all 3 spectra are identical).

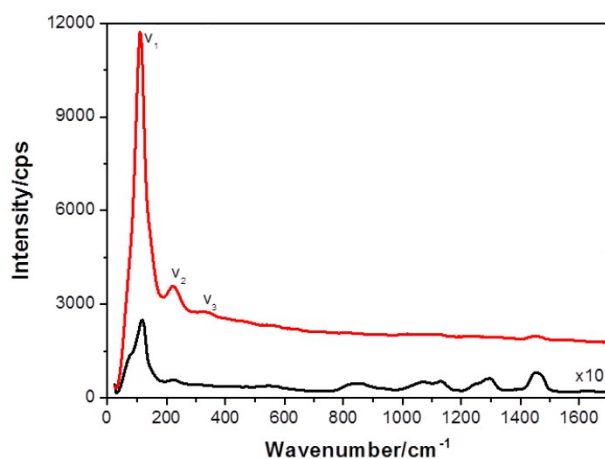

**Figure S4.** Raman spectra of  $\text{G2-LiI-2}$  (bottom) and  $\text{G2-LiI-I}_2\text{-2}$  (top).

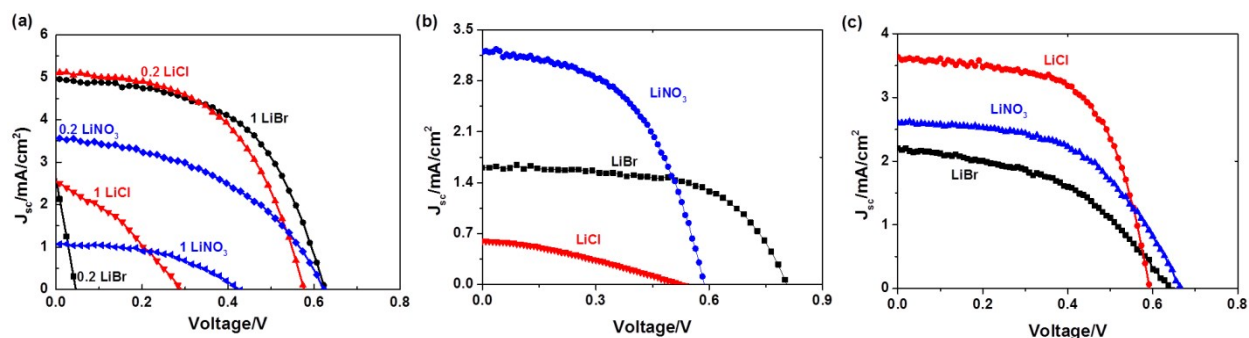

**Figure S5.** I-V curve of DSSC constructed from (a)  $\text{G2-LiI-I}_2\text{-LiX}$  (type and amount of LiX is indicated in the graphs) and the  $\text{G2-LiCl-2-LiI-0.7-I}_2$ ,  $\text{G2-LiBr-2-LiI-0.7-I}_2$ , and  $\text{G2-LiNO}_3\text{-2-LiI-0.7-I}_2$  gel electrolytes (b) without 4TBP and (c) with 4TBP.

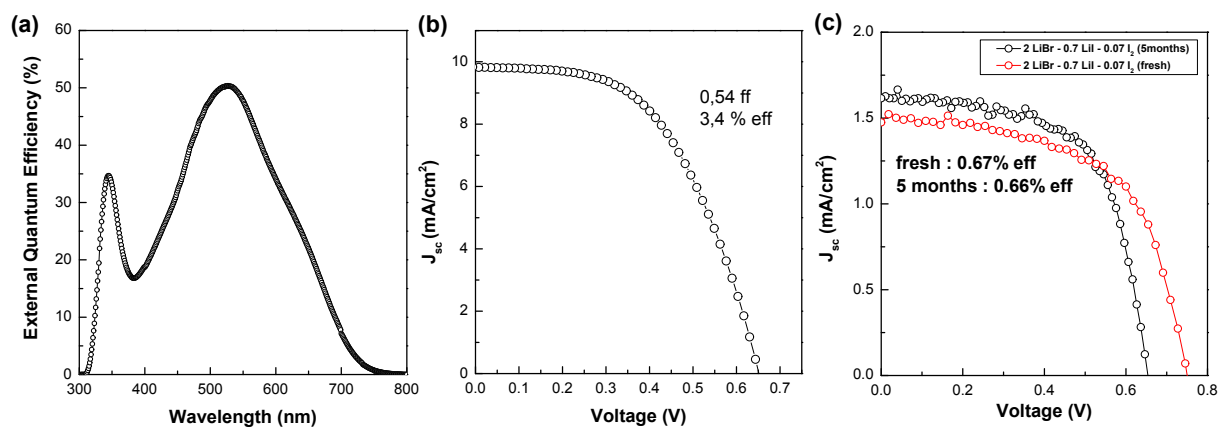

**Figure S6.** (a) IPCE and (b) IV curves of the cell constructed using G2-LiI-I<sub>2</sub>-2 electrolyte and (c) IV curve of a cell constructed using of G2-LiBr-2-LiI-I<sub>2</sub>-0.7 (i) fresh and (ii) 5 months old cell.
